# Supplementary material for: A Robust and Standardized Approach to Quantify Wound Closure Using the Scratch Assay
Source: MDPI journal article supplement (doi:10.3390/mps6050087), 2023-09-17
Supplement: s1 [file s1]

**Table S1.** Average width of scratches created in HEKa monolayer cells, using a yellow pipette tip and blue pipette tip.

| <b>Yellow Tip</b> | <b>Width (μm)</b> | <b>Blue Tip</b> | <b>Width (μm)</b> |
|-------------------|-------------------|-----------------|-------------------|
| Sample 1 a)       | 713.35            | Sample 1 a)     | 914.414           |
| b)                | 774.687           | b)              | 959.396           |
| c)                | 809.949           | c)              | 1316.972          |
| Sample 2 a)       | 712.191           | Sample 2 a)     | 1230.454          |
| b)                | 733.82            | b)              | 1211.442          |
| c)                | 717.102           | c)              | 1204.288          |
| Sample 3 a)       | 904.736           | Sample 3 a)     | 985.767           |
| b)                | 795.088           | b)              | 1011.08           |
| c)                | 990.144           |                 |                   |
| Avg. Width        | 794.563           |                 | 1104.227          |
| SD                | 96.23714          |                 | 152.3225          |

**Note:** a, b and c refer to different technical replicates within each sample

**Table S2.** Total area of scratch measured in each sample well, measured in pixels. Rows highlighted in red indicate fields of view emitted from the total scratch area used for calculation.

|                               | <b>Sample 1 (pixels)</b> | <b>Sample 2 (pixels)</b> | <b>Sample 3 (pixels)</b> |
|-------------------------------|--------------------------|--------------------------|--------------------------|
| <b>Field of View 1</b>        | <b>781,068</b>           | <b>820,421</b>           | <b>805,117</b>           |
| Field of View 2               | 1,106,869                | 1,218,963                | 1,189,862                |
| Field of View 3               | 1,185,137                | 1,242,776                | 1,134,209                |
| Field of View 4               | 1,233,318                | 1,278,831                | 1,077,086                |
| Field of View 5               | 1,244,192                | 1,258,116                | 1,275,993                |
| Field of View 6               | 1,194,878                | 1,289,073                | 1,525,943                |
| <b>Field of View 7</b>        | <b>1,173,379</b>         | <b>773,420</b>           | <b>1,245,388</b>         |
| Total                         | 7,918,841                | 7,881,600                | 8,253,598                |
| Total Scratch Area %          | 75.32                    | 79.78                    | 75.16                    |
| Average of Total Scratch Area | 76.75                    |                          |                          |
| SD                            | 2.62                     |                          |                          |

**Table S3.** Scratch wound area, measured over 12-hr period, of all 5 fields of view taken per well, with the summation of each field of view also. Area represented as pixels as well as percent of the original scratch.

|                   | <b>0 h area</b> | <b>12 h area</b> | <b>0 h area (%)</b> | <b>12 h area (%)</b> |
|-------------------|-----------------|------------------|---------------------|----------------------|
| Replicate 1-1     | 888,480.0       | 528,908.0        | 100.0               | 59.5                 |
| Replicate 1-2     | 930,143.0       | 793,298.0        | 100.0               | 85.3                 |
| Replicate 1-3     | 938,988.0       | 515,935.0        | 100.0               | 54.9                 |
| Replicate 1-4     | 958,758.0       | 488,960.0        | 100.0               | 51.0                 |
| Replicate 1-5     | 1,027,254.0     | 527,436.0        | 100.0               | 51.3                 |
| Replicate 1 total | 4,743,623.0     | 2,854,537.0      | 100.0               | 60.2                 |
| Replicate 2-1     | 794,649.0       | 4004,10.0        | 100.0               | 50.4                 |
| Replicate 2-2     | 845,893.0       | 470,299.0        | 100.0               | 55.6                 |
| Replicate 2-3     | 896,683.0       | 600,990.0        | 100.0               | 67.0                 |
| Replicate 2-4     | 871,222.0       | 562,381.0        | 100.0               | 64.6                 |
| Replicate 2-5     | 959,130.0       | 616,198.0        | 100.0               | 64.2                 |
| Replicate 2 total | 4,367,577.0     | 2,650,278.0      | 100.0               | 60.7                 |
| Replicate 3-1     | 1,033,879.0     | 491,802.0        | 100.0               | 47.6                 |

|                   |             |             |       |      |
|-------------------|-------------|-------------|-------|------|
| Replicate 3-2     | 1,103,281.0 | 553,175.0   | 100.0 | 50.1 |
| Replicate 3-3     | 1,100,017.0 | 585,185.0   | 100.0 | 53.2 |
| Replicate 3-4     | 1,136,240.0 | 701,781.0   | 100.0 | 61.8 |
| Replicate 3-5     | 1,266,780.0 | 815,026.0   | 100.0 | 64.3 |
| Replicate 3 total | 5,640,197.0 | 3,146,969.0 | 100.0 | 55.8 |
| Replicate avg     | 4,917,132.3 | 2,883,928.0 | 100.0 | 58.9 |
| Replicate STD     | 653,811.5   | 249,646.5   | 0.0   | 2.7  |
