# Supplementary material for: A Robust and Standardized Approach to Quantify Wound Closure Using the Scratch Assay
Source: Methods Protoc. 2023 Sep 17;6(5):87. doi: 10.3390/mps6050087 (PMC10514857; doi:10.3390/mps6050087)
Supplement: Supplementary file 1 [file mps-06-00087-s001.zip › File S1 - Scratch Outline Macro ImageJ.txt]

name=getTitle;
selectWindow(name);
run("Set Scale...", "distance=0 known=0 unit=pixel");
run("Duplicate...", " ");
name2=getTitle;
run("Colors...", "foreground=black background=black selection=yellow");
selectWindow(name2);

run("8-bit");
run("Median...", "radius=4");
run("Find Edges");


run("Enhance Contrast...", "saturated=0 equalize");
setThreshold(90 , 255);

run("Convert to Mask");
name2=getTitle;
run("Analyze Particles...", "size=0-25 show=Outlines display exclude include summarize add");
selectWindow(name2);
run("Duplicate...", " ");

name3=getTitle;
selectWindow(name3);
// removes debris in background of smaller size
n = roiManager('count');
for (i = 0; i < n; i++) {
    roiManager('select', i);
    roiManager("fill");
}

selectWindow(name3);
run("Analyze Particles...", "size=0-100 circularity=0-0.3 show=Outlines display exclude include summarize add");
selectWindow(name3);
// removes linear like particles at larger sizes
n = roiManager('count');
for (i = 0; i < n; i++) {
    roiManager('select', i);
    roiManager("fill");
}

roiManager("deselect");
roiManager("delete");
selectWindow(name3);
run("Duplicate...", " ");
name5=getTitle;
selectWindow(name5)
run("Options...", "iterations=10 count=1 black pad do=Close");
run("Options...", "iterations=10 count=1 black do=Dilate");
run("Invert");
// for initial images, change size to 200-500k so it only looks at the large scratch, especialy if culture isn't confluent
run("Analyze Particles...", "size=10000-infinity show=Outlines display include summarize add");
roiManager("combine");
roiManager("add");
count2=roiManager("count");

roiManager("deselect");
selectWindow(name3);
run("Duplicate...", " ");
name6=getTitle;
selectWindow(name6)
roiManager("select", count2-1);

run("Options...", "iterations=1 count=1 black pad do=Close");
run("Analyze Particles...", "size=90-60000 show=Outlines display exclude include summarize add");


count6=roiManager("count");
if(count6>count2){
	roiManager("XOR");
roiManager("Add");
count1 = roiManager("count");
roiManager("Select", newArray(count1-1, count2-1));
roiManager("XOR");
roiManager("Add");
}


count5=roiManager("count");
roiManager("select", count5-1);
roiManager("Measure");
finalarea = getResult("Area");

selectWindow(name);
close("\\Others");
run("Roi Defaults...", "color=red stroke=0 group=0");
roiManager("select", count5-1);

print(name + " Scratch Area:", finalarea);
